# Supplementary material for: Diagnostic anticipation to reduce emergency department length of stay: a retrospective cohort study in Ferrara University hospital, Italy
Source: Springer Nature journal article supplement (doi:10.1186/s12913-020-05472-3), 2020-07-08

# Additional files: case definition for presenting complaints

## CHEST PAIN

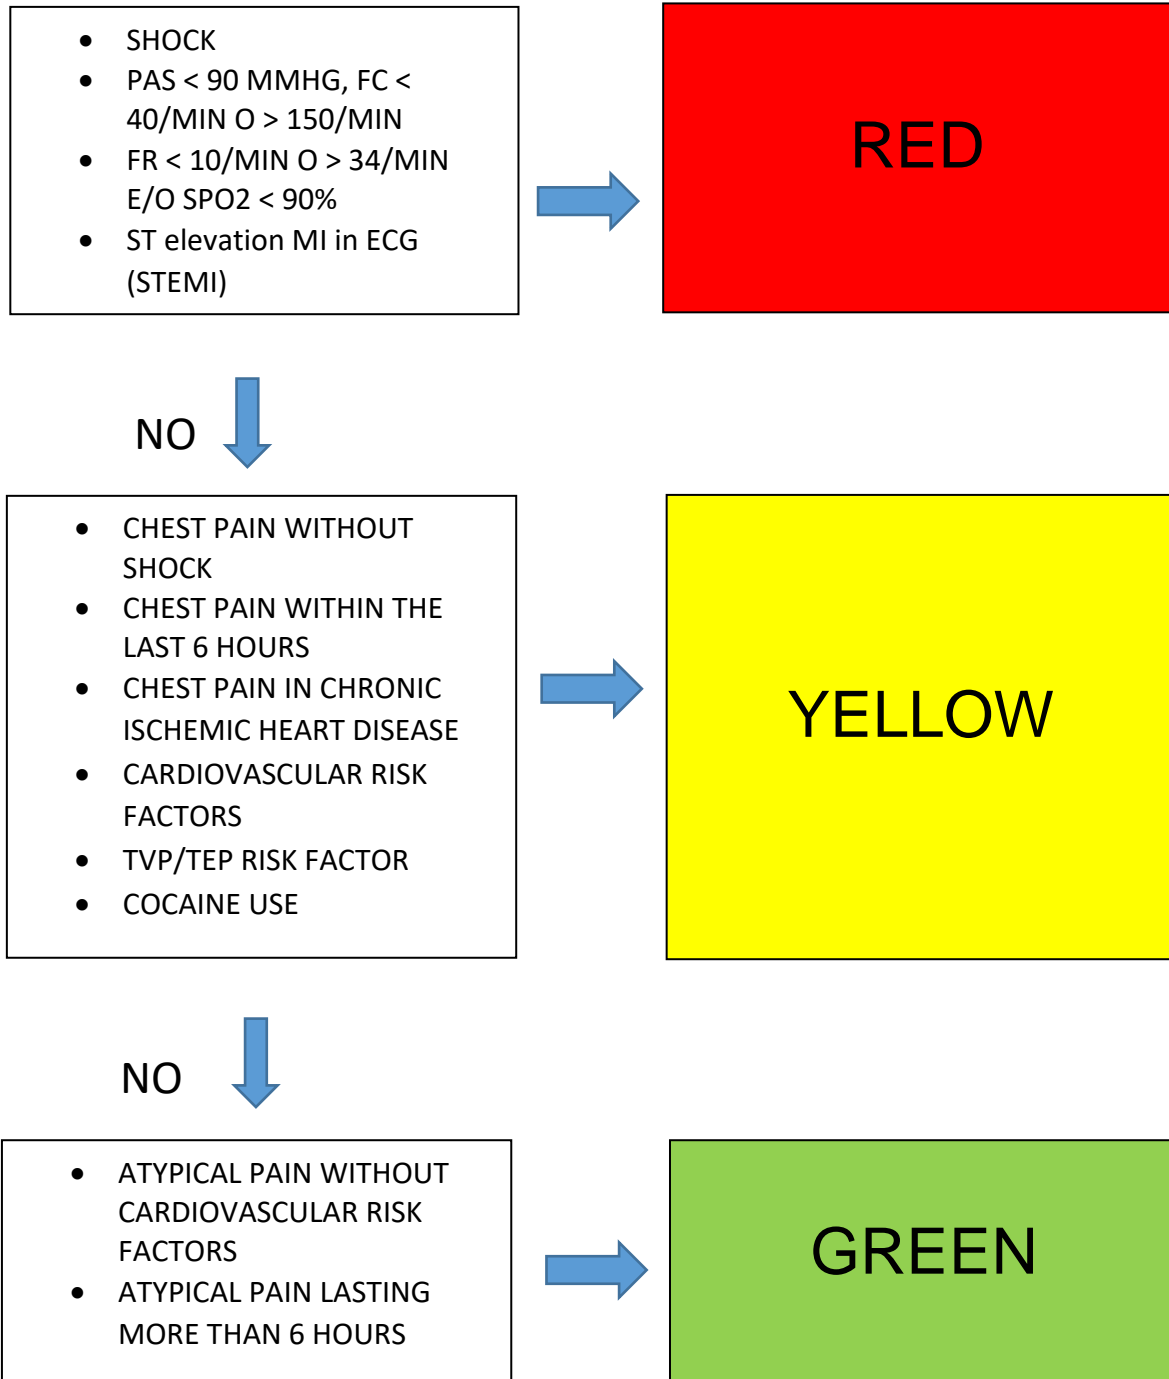

# ABDOMINAL PAIN

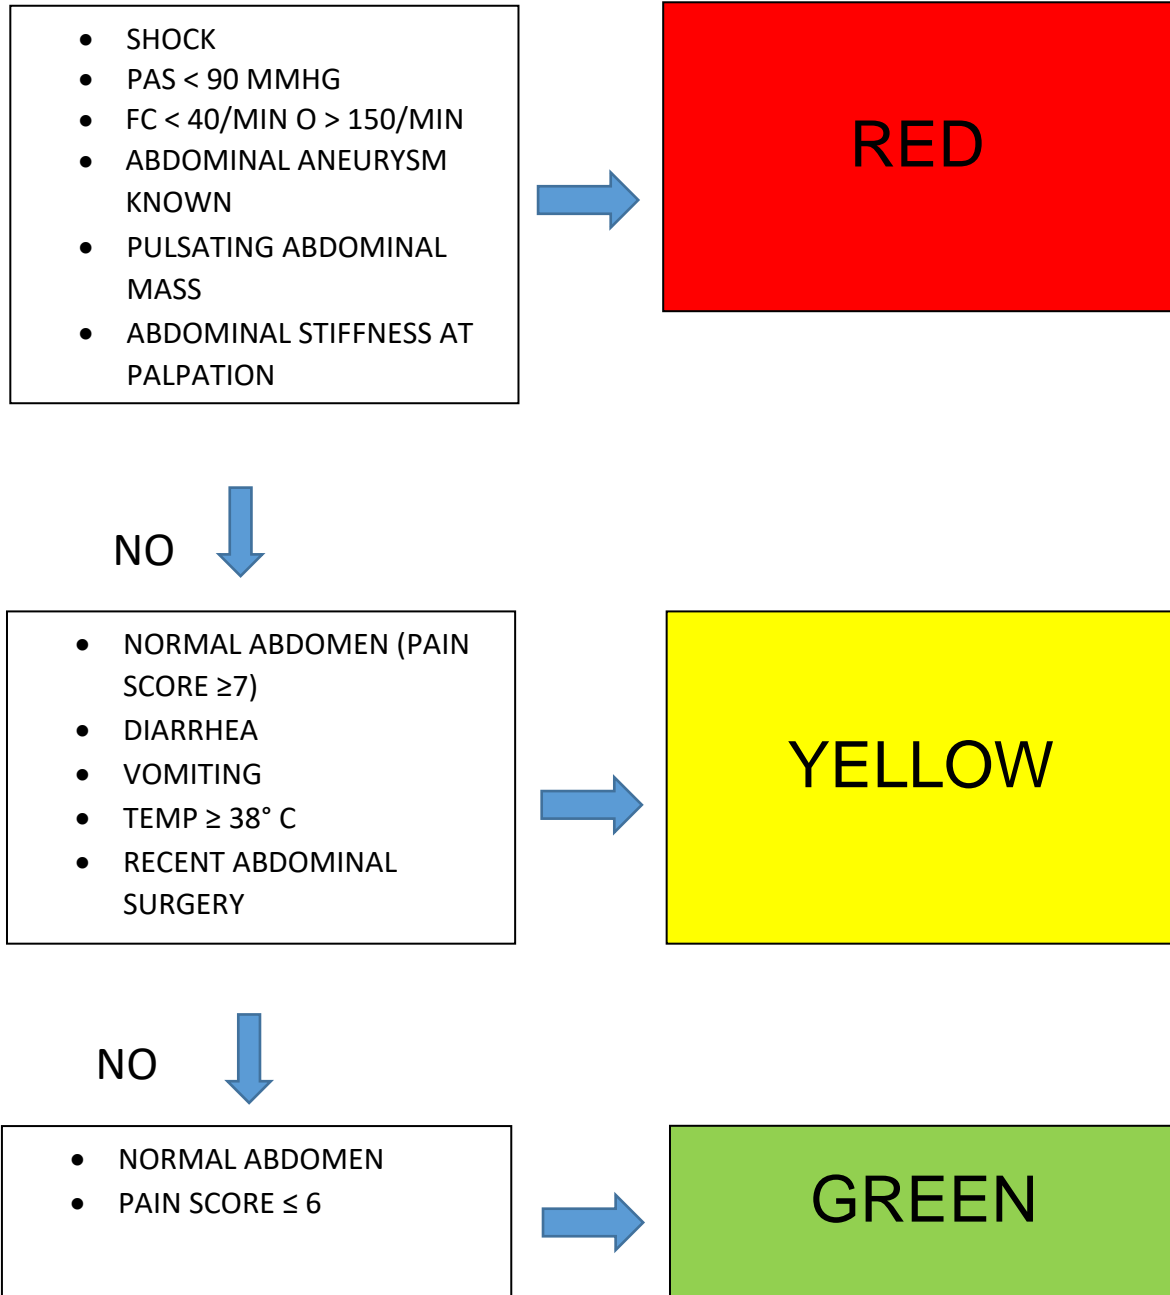

# NON TRAUMATIC BLEEDING

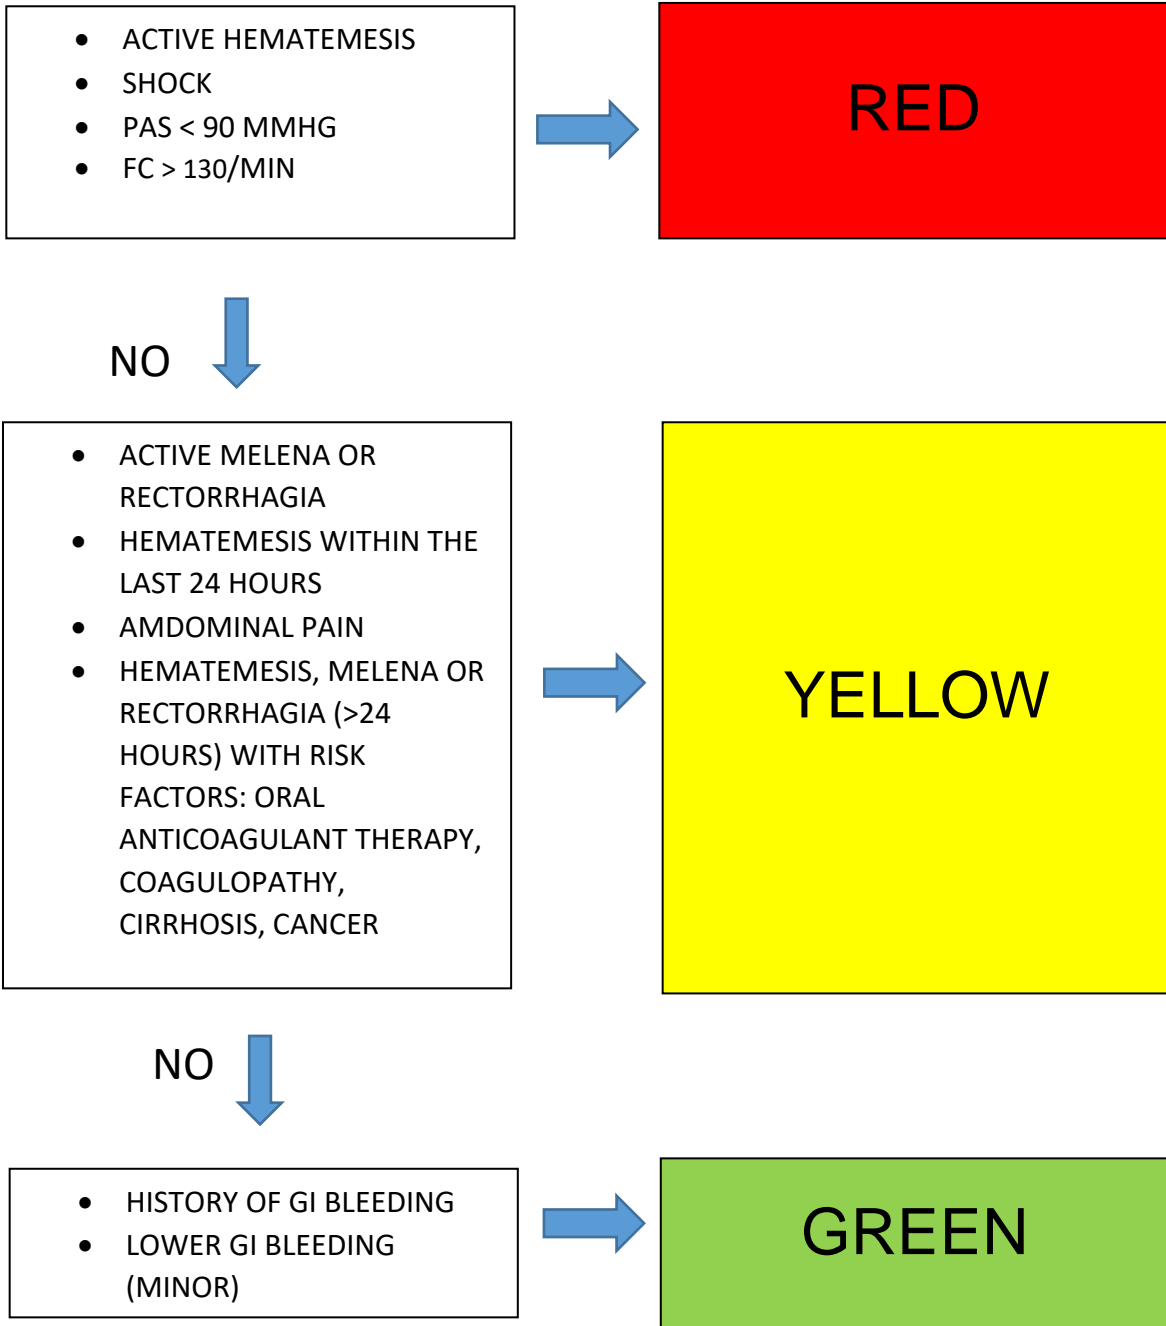

Supplement: MOESM1 [file 12913_2020_5472_MOESM1_ESM%20%281%29.pdf]
